# Supplementary figures and images for: Abundant and Diverse Clustered Regularly Interspaced Short Palindromic Repeat Spacers in Clostridium difficile Strains and Prophages Target Multiple Phage Types within This Pathogen
Source: PubMed Central journal article supplement — mBio. 2014 Aug 26;5(5):e01045-13. doi: 10.1128/mBio.01045-13 (PMC4173771; doi:10.1128/mbio.01045-13), 2014-08-26

1 2 3 4 5 6 7 8 9 10

1 kbp

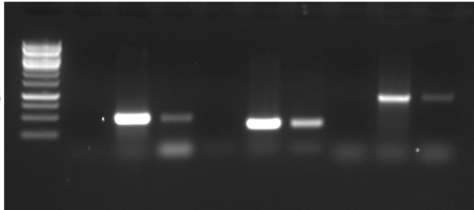

Supplement: mbo004141954sf01.pdf [file mbo004141954sf01.pdf]
